# Supplementary material for: Population- and Sex-Biased Gene Expression in the Excretion Organs of Drosophila melanogaster
Source: PubMed Central journal article supplement (PMC4267927; doi:10.1534/g3.114.013417), 2014-09-22
Supplement: supp_g3.114.013417_TableS1.pdf [file supp_g3.114.013417_TableS1.pdf]

**Table S1** Number of genes meeting various read-count thresholds

| Reads | Genes  | Sex-biased (female, male) | Population-biased (Africa, Europe) |
|-------|--------|---------------------------|------------------------------------|
| 12    | 12,547 | 2,308 (905, 1,403)        | 2,474 (1,230, 1,244)               |
| 20    | 12,001 | 2,272 (898, 1,374)        | 2,459 (1,222, 1,237)               |
| 50    | 10,793 | 2,098 (858, 1,240)        | 2,436 (1,206, 1,230)               |
| 100   | 9,785  | 1,871 (798, 1,073)        | 2,382 (1,182, 1,200)               |
| 150   | 9,272  | 1,785 (772, 1,013)        | 2,340 (1,164, 1,176)               |

Shown is the total number of genes meeting each read-count threshold, as well as the number of significant sex- and population-biased genes at a FDR of 5%.
