# Supplementary material for: Population- and Sex-Biased Gene Expression in the Excretion Organs of Drosophila melanogaster
Source: PubMed Central journal article supplement (PMC4267927; doi:10.1534/g3.114.013417), 2014-09-22
Supplement: supp_g3.114.013417_TableS2.pdf [file supp_g3.114.013417_TableS2.pdf]

**Table S2 Number of significant genes detected by different methods**

| Bias       | DESeq2 | edgeR (overlap <sup>a</sup> ) | baySeq (overlap <sup>a</sup> ) |
|------------|--------|-------------------------------|--------------------------------|
| Sex        | 2,308  | 1,249 (85.6%)                 | 557 (98.4%)                    |
| Female     | 905    | 251 (91.2%)                   | 88 (98.9%)                     |
| Male       | 1,403  | 998 (84.2%)                   | 469 (98.3%)                    |
| Population | 2,474  | 1,015 (87.9%)                 | 496 (97.2%)                    |
| Africa     | 1,230  | 465 (88.2%)                   | 200 (95.5%)                    |
| Europe     | 1,244  | 550 (87.6%)                   | 296 (98.3%)                    |

<sup>a</sup> Percent overlap with the significant genes detected by DESeq2.
