# Supplementary material for: Population- and Sex-Biased Gene Expression in the Excretion Organs of Drosophila melanogaster
Source: PubMed Central journal article supplement (PMC4267927; doi:10.1534/g3.114.013417), 2014-09-22
Supplement: supp_g3.114.013417_TableS3.pdf [file supp_g3.114.013417_TableS3.pdf]

**Table S3 Over-represented GO terms among female-biased genes.**

| Ontology           | GO Term                                                                     | Genes | Adj. <i>P</i> |
|--------------------|-----------------------------------------------------------------------------|-------|---------------|
| Molecular function | structural constituent of ribosome                                          | 54    | 1.8e-12       |
| Molecular function | proton-transporting ATPase activity, rotational mechanism                   | 15    | 1.1e-08       |
| Molecular function | ATP binding                                                                 | 70    | 9.6e-05       |
| Molecular function | mRNA binding                                                                | 29    | 0.001         |
| Molecular function | proton-transporting ATP synthase activity, rotational mechanism             | 7     | 0.001         |
| Molecular function | structural constituent of chorion                                           | 6     | 0.001         |
| Molecular function | ATP-dependent RNA helicase activity                                         | 11    | 0.003         |
| Molecular function | hydrogen-exporting ATPase activity, phosphorylative mechanism               | 8     | 0.005         |
| Molecular function | actin binding                                                               | 19    | 0.01          |
| Molecular function | microtubule binding                                                         | 14    | 0.02          |
| Molecular function | aminoacyl-tRNA editing activity                                             | 4     | 0.02          |
| Molecular function | L-amino acid transmembrane transporter activity                             | 5     | 0.03          |
| Molecular function | symporter activity                                                          | 14    | 0.03          |
| Molecular function | protein serine/threonine kinase activity                                    | 25    | 0.03          |
| Molecular function | inorganic anion transmembrane transporter activity                          | 11    | 0.04          |
| Molecular function | acid phosphatase activity                                                   | 5     | 0.04          |
| Cellular component | cytosolic large ribosomal subunit                                           | 22    | 6.0e-10       |
| Cellular component | cytosolic small ribosomal subunit                                           | 19    | 6.0e-10       |
| Cellular component | plasma membrane proton-transporting V-type ATPase complex                   | 10    | 1.6e-07       |
| Cellular component | microtubule associated complex                                              | 50    | 6.8e-06       |
| Cellular component | lipid particle                                                              | 34    | 1.8e-05       |
| Cellular component | vacuolar proton-transporting V-type ATPase, V1 domain                       | 7     | 0.001         |
| Cellular component | chorion                                                                     | 11    | 0.001         |
| Cellular component | spindle midzone                                                             | 6     | 0.002         |
| Cellular component | nucleolus                                                                   | 21    | 0.003         |
| Cellular component | mitochondrial matrix                                                        | 23    | 0.006         |
| Cellular component | mitochondrial proton-transporting ATP synthase complex, catalytic core F(1) | 5     | 0.01          |
| Cellular component | small-subunit processome                                                    | 4     | 0.02          |
| Cellular component | euchromatin                                                                 | 6     | 0.03          |
| Cellular component | centrosome                                                                  | 14    | 0.03          |
| Biological process | mitotic spindle elongation                                                  | 24    | 5.8e-09       |
| Biological process | ATP hydrolysis coupled proton transport                                     | 15    | 4.7e-07       |
| Biological process | rRNA processing                                                             | 14    | 1.3e-05       |
| Biological process | centrosome duplication                                                      | 20    | 1.3e-05       |
| Biological process | germ cell development                                                       | 44    | 0.0002        |
| Biological process | protein localization                                                        | 49    | 0.002         |
| Biological process | asymmetric neuroblast division                                              | 11    | 0.002         |
| Biological process | regulation of cell shape                                                    | 19    | 0.004         |

|                    |                                                        |    |       |
|--------------------|--------------------------------------------------------|----|-------|
| Biological process | regulation of growth                                   | 28 | 0.005 |
| Biological process | ribosomal small subunit biogenesis                     | 5  | 0.005 |
| Biological process | protein phosphorylation                                | 33 | 0.006 |
| Biological process | negative regulation of cellular process                | 78 | 0.007 |
| Biological process | actin cytoskeleton organization                        | 27 | 0.007 |
| Biological process | female germ-line sex determination                     | 4  | 0.008 |
| Biological process | translational elongation                               | 8  | 0.008 |
| Biological process | regulation of cellular component size                  | 17 | 0.01  |
| Biological process | chorion-containing eggshell formation                  | 20 | 0.01  |
| Biological process | cellular macromolecule localization                    | 39 | 0.01  |
| Biological process | long-term memory                                       | 12 | 0.01  |
| Biological process | ATP synthesis coupled proton transport                 | 7  | 0.01  |
| Biological process | ommochrome biosynthetic process                        | 7  | 0.01  |
| Biological process | regulation of cell differentiation                     | 35 | 0.01  |
| Biological process | regulation of cellular component biogenesis            | 22 | 0.02  |
| Biological process | regulation of cytoskeleton organization                | 15 | 0.02  |
| Biological process | L-amino acid transport                                 | 4  | 0.02  |
| Biological process | mitotic cell cycle phase transition                    | 7  | 0.02  |
| Biological process | establishment of localization in cell                  | 53 | 0.02  |
| Biological process | pupariation                                            | 5  | 0.03  |
| Biological process | regulation of DNA replication                          | 6  | 0.03  |
| Biological process | cellular component assembly involved in morphogenesis  | 23 | 0.03  |
| Biological process | amino acid transmembrane transport                     | 8  | 0.03  |
| Biological process | positive regulation of cellular component organization | 16 | 0.03  |

---
