# Supplementary material for: Population- and Sex-Biased Gene Expression in the Excretion Organs of Drosophila melanogaster
Source: PubMed Central journal article supplement (PMC4267927; doi:10.1534/g3.114.013417), 2014-09-22
Supplement: supp_g3.114.013417_TableS4.pdf [file supp_g3.114.013417_TableS4.pdf]

**Table S4 Over-represented GO terms among male-biased genes.**

| Ontology           | GO Term                                                                                               | Genes | Adj. <i>P</i> |
|--------------------|-------------------------------------------------------------------------------------------------------|-------|---------------|
| Molecular function | electron carrier activity                                                                             | 42    | 5.2e-10       |
| Molecular function | manganese ion binding                                                                                 | 12    | 4.1e-06       |
| Molecular function | iron ion binding                                                                                      | 37    | 5.4e-06       |
| Molecular function | glutathione transferase activity                                                                      | 17    | 7.3e-06       |
| Molecular function | acyl-CoA dehydrogenase activity                                                                       | 10    | 2.2e-05       |
| Molecular function | oxidoreductase activity, acting on paired donors, with incorporation or reduction of molecular oxygen | 37    | 4.6e-05       |
| Molecular function | flavin adenine dinucleotide binding                                                                   | 19    | 5.4e-05       |
| Molecular function | oxidoreductase activity, acting on the CH-OH group of donors, NAD or NADP as acceptor                 | 23    | 7.5e-05       |
| Molecular function | NAD binding                                                                                           | 13    | 0.003         |
| Molecular function | aminopeptidase activity                                                                               | 13    | 0.01          |
| Molecular function | carbohydrate kinase activity                                                                          | 8     | 0.01          |
| Molecular function | hydro-lyase activity                                                                                  | 13    | 0.02          |
| Molecular function | oxidoreductase activity, acting on the aldehyde or oxo group of donors, NAD or NADP as acceptor       | 11    | 0.02          |
| Molecular function | long-chain fatty acid transporter activity                                                            | 5     | 0.03          |
| Molecular function | disulfide oxidoreductase activity                                                                     | 10    | 0.03          |
| Cellular component | lipid particle                                                                                        | 44    | 5.9e-06       |
| Cellular component | mitochondrial matrix                                                                                  | 35    | 2.6e-05       |
| Cellular component | endoplasmic reticulum part                                                                            | 23    | 0.02          |
| Cellular component | coated vesicle membrane                                                                               | 9     | 0.03          |
| Cellular component | peroxisome                                                                                            | 12    | 0.03          |
| Cellular component | Golgi membrane                                                                                        | 11    | 0.04          |
| Biological process | fatty acid beta-oxidation                                                                             | 10    | 4.6e-06       |
| Biological process | glutathione metabolic process                                                                         | 18    | 5.8e-06       |
| Biological process | protein folding                                                                                       | 27    | 3.8e-05       |
| Biological process | glycolysis                                                                                            | 12    | 0.0002        |
| Biological process | dicarboxylic acid metabolic process                                                                   | 10    | 0.02          |
| Biological process | branched-chain amino acid metabolic process                                                           | 5     | 0.03          |
| Biological process | glycerol ether metabolic process                                                                      | 7     | 0.03          |
