# Supplementary material for: Population- and Sex-Biased Gene Expression in the Excretion Organs of Drosophila melanogaster
Source: PubMed Central journal article supplement (PMC4267927; doi:10.1534/g3.114.013417), 2014-09-22
Supplement: supp_g3.114.013417_TableS5.pdf [file supp_g3.114.013417_TableS5.pdf]

**Table S5 Over-represented GO terms among Africa-biased genes.**

| Ontology           | GO Term                                                                               | Genes | Adj. <i>P</i> |
|--------------------|---------------------------------------------------------------------------------------|-------|---------------|
| Molecular function | proton-transporting ATPase activity, rotational mechanism                             | 15    | 1.7e-06       |
| Molecular function | heme binding                                                                          | 30    | 7.3e-05       |
| Molecular function | iron ion binding                                                                      | 30    | 0.002         |
| Molecular function | anion binding                                                                         | 117   | 0.002         |
| Molecular function | cofactor binding                                                                      | 30    | 0.01          |
| Molecular function | nucleotide binding                                                                    | 122   | 0.02          |
| Molecular function | protein kinase activity                                                               | 40    | 0.04          |
| Molecular function | oxidoreductase activity, acting on the CH-OH group of donors, NAD or NADP as acceptor | 17    | 0.04          |
| Molecular function | glutathione transferase activity                                                      | 11    | 0.04          |
| Cellular component | vacuolar proton-transporting V-type ATPase, V1 domain                                 | 9     | 8.9e-05       |
| Biological process | ATP hydrolysis coupled proton transport                                               | 16    | 7.5e-06       |
| Biological process | carbohydrate metabolic process                                                        | 48    | 0.0001        |
| Biological process | male courtship behavior, veined wing generated song production                        | 10    | 0.001         |
| Biological process | chemical homeostasis                                                                  | 25    | 0.001         |
| Biological process | negative regulation of signal transduction                                            | 35    | 0.001         |
| Biological process | neuron development                                                                    | 83    | 0.001         |
| Biological process | regulation of organ morphogenesis                                                     | 19    | 0.004         |
| Biological process | glutathione metabolic process                                                         | 13    | 0.007         |
| Biological process | regulation of neurogenesis                                                            | 24    | 0.01          |
| Biological process | visual perception                                                                     | 11    | 0.02          |
| Biological process | taxis                                                                                 | 43    | 0.02          |
| Biological process | regulation of transport                                                               | 24    | 0.02          |
| Biological process | dorsal/ventral pattern formation                                                      | 28    | 0.02          |
| Biological process | detection of visible light                                                            | 9     | 0.02          |
| Biological process | regulation of cell morphogenesis                                                      | 27    | 0.02          |
| Biological process | cellular response to endogenous stimulus                                              | 20    | 0.02          |
| Biological process | regulation of immune system process                                                   | 23    | 0.02          |
| Biological process | regulation of response to external stimulus                                           | 10    | 0.02          |
| Biological process | glycerophospholipid metabolic process                                                 | 16    | 0.02          |
| Biological process | cell morphogenesis                                                                    | 78    | 0.03          |
| Biological process | cellular response to growth factor stimulus                                           | 11    | 0.03          |
| Biological process | cell fate commitment                                                                  | 60    | 0.03          |
| Biological process | regulation of organ growth                                                            | 12    | 0.03          |
| Biological process | pyridine-containing compound metabolic process                                        | 8     | 0.03          |
| Biological process | regulation of G-protein coupled receptor protein signaling pathway                    | 9     | 0.04          |
| Biological process | cellular biogenic amine metabolic process                                             | 9     | 0.04          |
| Biological process | salivary gland histolysis                                                             | 17    | 0.04          |
| Biological process | phototransduction                                                                     | 12    | 0.04          |

|                    |                                                  |    |      |
|--------------------|--------------------------------------------------|----|------|
| Biological process | imaginal disc-derived wing morphogenesis         | 48 | 0.04 |
| Biological process | enzyme linked receptor protein signaling pathway | 28 | 0.04 |
| Biological process | negative regulation of cell differentiation      | 22 | 0.04 |
| Biological process | regulation of BMP signaling pathway              | 8  | 0.04 |
| Biological process | fatty acid beta-oxidation                        | 6  | 0.04 |
| Biological process | protein phosphorylation                          | 38 | 0.05 |
| Biological process | renal system development                         | 16 | 0.05 |
| Biological process | morphogenesis of a polarized epithelium          | 19 | 0.05 |

---
