# Supplementary material for: Population- and Sex-Biased Gene Expression in the Excretion Organs of Drosophila melanogaster
Source: PubMed Central journal article supplement (PMC4267927; doi:10.1534/g3.114.013417), 2014-09-22
Supplement: supp_g3.114.013417_TableS6.pdf [file supp_g3.114.013417_TableS6.pdf]

**Table S6 Over-represented GO terms among Europe-biased genes.**

| Ontology           | GO Term                                                                                               | Genes | Adj. <i>P</i> |
|--------------------|-------------------------------------------------------------------------------------------------------|-------|---------------|
| Molecular function | electron carrier activity                                                                             | 32    | 0.0001        |
| Molecular function | oxidoreductase activity, acting on paired donors, with incorporation or reduction of molecular oxygen | 31    | 0.01          |
| Molecular function | cofactor binding                                                                                      | 31    | 0.01          |
| Molecular function | oxidoreductase activity, acting on the CH-OH group of donors, NAD or NADP as acceptor                 | 19    | 0.01          |
| Molecular function | ATP binding                                                                                           | 79    | 0.02          |
| Molecular function | iron ion binding                                                                                      | 28    | 0.02          |
| Molecular function | transporter activity                                                                                  | 99    | 0.03          |
| Molecular function | disulfide oxidoreductase activity                                                                     | 10    | 0.03          |
| Cellular component | membrane part                                                                                         | 173   | 0.02          |
| Cellular component | mitochondrial envelope                                                                                | 38    | 0.02          |
| Cellular component | cytoskeletal part                                                                                     | 69    | 0.03          |
| Cellular component | lipid particle                                                                                        | 33    | 0.04          |
| Biological process | oxidation-reduction process                                                                           | 87    | 4.6e-08       |
| Biological process | organonitrogen compound metabolic process                                                             | 84    | 0.001         |
| Biological process | carboxylic acid metabolic process                                                                     | 49    | 0.001         |
| Biological process | carbohydrate derivative metabolic process                                                             | 59    | 0.01          |
| Biological process | cellular response to stress                                                                           | 56    | 0.02          |
| Biological process | single-organism transport                                                                             | 138   | 0.02          |
| Biological process | cellular localization                                                                                 | 81    | 0.03          |
| Biological process | centrosome organization                                                                               | 23    | 0.03          |
| Biological process | organic substance catabolic process                                                                   | 61    | 0.04          |
| Biological process | cell redox homeostasis                                                                                | 13    | 0.04          |
